# Supplementary material for: Deficiency of Thyroid Hormone Reduces Voltage-Gated Na+ Currents as Well as Expression of Na+/K+-ATPase in the Mouse Hippocampus
Source: MDPI journal article supplement (doi:10.3390/ijms23084133), 2022-04-08
Supplement: s1 [file s1]

[illegible]

Gel nr. 6

Western blot analysis of Hsp90α and β-tubulin in H1299 cells. The top panel shows Hsp90α bands for Control, Dox, and Dox+Mg. The bottom panel shows β-tubulin bands for the same conditions. The entire blot is crossed out with a large red X.

Gel nr. 4

Gel nr. 6

P1 P2 P3 P4 P5 P6 P7 P8 P9 P10

Gel

$\text{Pax8}^{+/-}$   $\text{Pax8}^{+/-}$   $\text{Pax8}^{-/-}$   $\text{Pax9}^{+/-}$   $\text{Pax9}^{+/-}$   $\text{Pax8}^{-/-}$   $\text{Pax9}^{+/-}$   $\text{Pax8}^{+/-}$   $\text{Pax8}^{-/-}$

~~(6) H~~

Pax8<sup>+/+</sup>  
Pax8<sup>+/-</sup>  
Pax8<sup>-/-</sup>  
Pax8<sup>+/+</sup>  
Pax8<sup>+/-</sup>  
Pax8<sup>-/-</sup>

P1  
P2

Pax8<sup>+/+</sup>  
 Pax8<sup>+/-</sup>  
 Pax8<sup>-/-</sup>  
 Pax8<sup>+/+</sup>  
 Pax8<sup>+/-</sup>  
 Pax8<sup>-/-</sup>  
 Pax8<sup>+/+</sup>  
 Pax8<sup>+/-</sup>  
 Pax8<sup>-/-</sup>

B2  
 H

Handwritten labels above the gel lanes: p218+/+, p218+/-, and p218-/-.

Handwritten labels to the right of the gel lanes:  $\beta_2$  (circled),  $\beta_2$  (circled), and HB.

The gel shows three lanes. The first lane (p218+/+) has two bands. The second lane (p218+/-) has two bands. The third lane (p218-/-) has two bands. A red box is drawn around the bands in the third lane, with a red 'X' over it.

Gel nr. 6

$Pax8^{+/-}$   
 $Pax8^{+/-}$   
 $Pax8^{-/-}$

$Pax8^{+/-}$   
 $Pax8^{+/-}$   
 $Pax8^{-/-}$

Pax8<sup>+/+</sup>  
Pax8<sup>+/-</sup>  
Pax8<sup>-/-</sup>

pax8+/-  
pax8+/-  
pax8-/-

**Note:**  crossed blots corresponding to  $\beta$  tubulin gels 1, 2, 3 or 6 were from midbrain tissues and thus not included in the present investigation on hippocampal tissues.
